# Supplementary material
Source: PubMed Central journal article supplement (PMC3229124)
Supplement: gmb-34-1-676-gfigsuppl1.pdf [file gmb-34-1-676-gfigsuppl1.pdf]

1  
2  
3  
4  
5  
6  
7  
8  
9  
10  
11  
12  
13  
14  
15  
16  
17  
18  
19  
20  
21  
22  
23  
24  
25

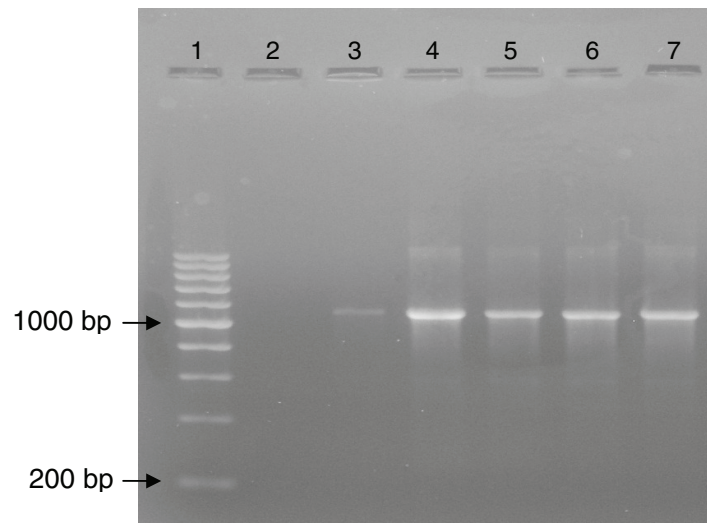

Figure S1 – Agarose gel 1% (w/v) showing the PCR products of the amplification of the 16S rRNA encoding region. 1: 200-bp ladder; 2-7: isolates.
