# Supplementary material
Source: PubMed Central journal article supplement (PMC3229124)
Supplement: gmb-34-1-676-gfigsuppl2.pdf [file gmb-34-1-676-gfigsuppl2.pdf]

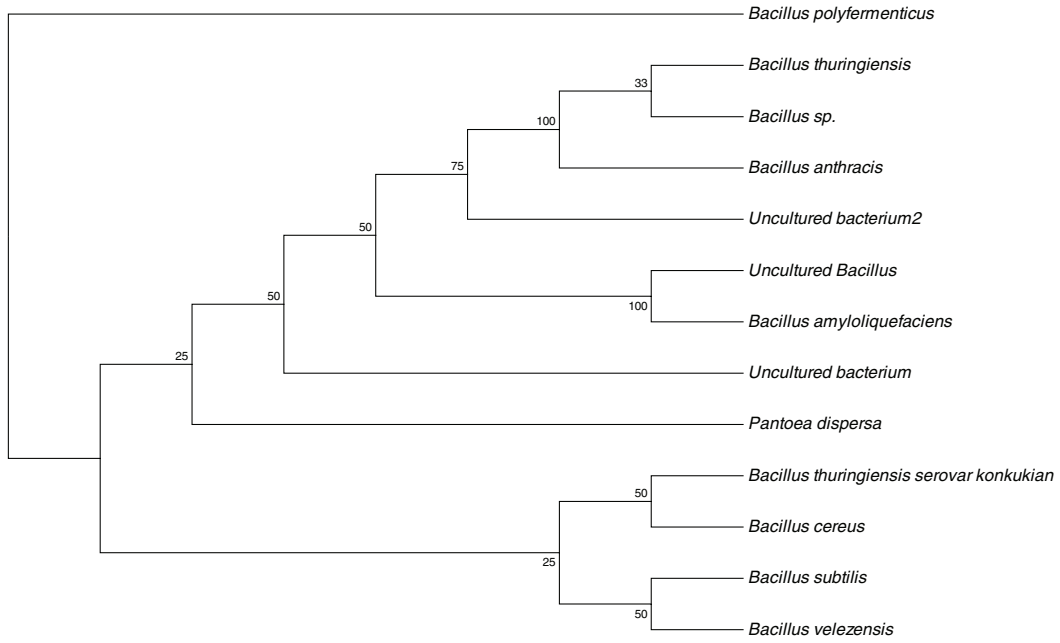

26

27 (a)

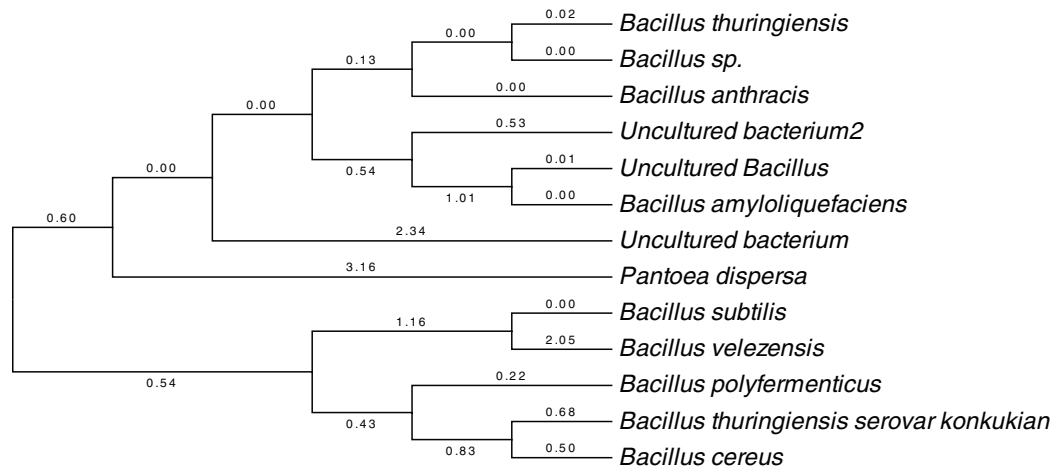

28

29 (b)

30 Figure S2 – Phylogenetic analysis showing the relationship of the 16S rRNA gene  
 31 sequences of isolates. The trees were generated using (a) Molecular Phylogenetic  
 32 analysis by Maximum Parsimony (MP) analysis of taxa and (b) Maximum Likelihood  
 33 (ML) method.
